# Supplementary material for: Pharmaceutical targeting of the cannabinoid type 1 receptor impacts the crosstalk between immune cells and islets to reduce insulitis in humans
Source: Springer Nature journal article supplement (doi:10.1007/s00125-024-06193-6), 2024-06-12
Supplement: MOESM1 [file 125_2024_6193_MOESM1_ESM.pdf]

**ESM Table 1. Oligonucleotides**

| <b>Gene</b>                                                                | <b>5'-3' Forward Primer</b> | <b>5'-3' Reverse Primer</b> |                                        |
|----------------------------------------------------------------------------|-----------------------------|-----------------------------|----------------------------------------|
| <i>ABDH6</i>                                                               | TGTCCGCATCCCTCATAA          | GTCGGAACCTTGATCTTGTC        |                                        |
| <i>ABDH12</i>                                                              | CTTCCAGCTTGGCAGAAA          | CTGTAGCCAAGGTCTGAATG        |                                        |
| <i>ATF4</i>                                                                | TATGAGCCCAGAGTCCTATC        | CAGGAGGATCGTAAGGTTTG        |                                        |
| <i>ATF6</i>                                                                | AACCTGCACCCACTADAGGE        | CAAGGACTGGCTGAGCAG          |                                        |
| <i>CCL2</i>                                                                | CAGCAAGTGTCCTCAAAGAAG       | GTCTTCGGAGTTTGGGTTTG        |                                        |
| <i>CD4</i>                                                                 | GTACAGCTTCCCAGAAGAAG        | CAGCTTGGATGGACCTTTAG        |                                        |
| <i>CXCL10</i>                                                              | GCATTCAAGGAGTACCTCTCTC      | CAGACATCTCTTCTCACCCCTC      |                                        |
| <i>DAGLA</i>                                                               | TAACCTGCGGACCTACAA          | GCAGCAGAGGAACACTTT          |                                        |
| <i>DAGLB</i>                                                               | GCAGTACTTGATCGTCCTC         | CGGTCCAGGGTTACAAATC         |                                        |
| <i>DDIT3</i>                                                               | CTTGGCTGACTGAGGAGGAG        | CTGGGGAATGACCACTCTGT        |                                        |
| <i>FAAH</i>                                                                | CAACTGTGTGACCTCCTATC        | ATGAACCGCAGACACAAC          |                                        |
| <i>GAPDH</i>                                                               | CATCCTGGGCTACACTGAGC        | AAAGTGGTCGTTGAGGGCAA        |                                        |
| <i>GPR78 (BiP)</i>                                                         | TTGACCAGCGTGTCATGGAA        | CGGAGTTTTGCACAGCTCT         |                                        |
| <i>HLA-ABC</i>                                                             | GAGAACGGGAAGGAGACGC         | CATCTCAGGGTGAGGGGCT         |                                        |
| <i>ICAM1</i>                                                               | GTTGTTGGGCATAGAGACC         | GCTCAGTTCATACACCTTCC        |                                        |
| <i>IFNG</i>                                                                | GAATGTCCAACGCAAAGC          | CCTCGAAACAGCATCTGAC         |                                        |
| <i>IL1B</i>                                                                | ATCTCCGACCACCACTAC          | AGGTGCTCAGGTCATTCT          |                                        |
| <i>MAGL</i>                                                                | AGGTGCCTACCATGTTCT          | TGGCTGTCTTTGAGAGA           |                                        |
| <i>NAPEPLD</i>                                                             | TGTGGCTGTGAGAATGTG          | GTGCTGGGAAGGTGTAAG          |                                        |
| <i>PDL1</i>                                                                | CACCAATTCCAAGAGAGAGG        | AGAGGTAGTTCTGGGATGAC        |                                        |
| <i>RPLP0</i>                                                               | CCTGAGTGATGTGCAGCTGA        | CCATTGTGGAACACCTGCTG        |                                        |
| <i>SLC2A1</i>                                                              | GTGCAGCAGECTGTGTATGC        | GGCCACGATGCTCAGATAGG        |                                        |
| <i>SLC2A2</i>                                                              | TGTGCTGGGTTCCCTCCAGT        | G999TTGGTTTTGGGTTTCT        |                                        |
| <i>TNF</i>                                                                 | CTCTTCTCCTTCTGATCGT         | CAGAGGGCTGATTAGAGAGA        |                                        |
| <i>CNR1</i>                                                                | From [5]                    |                             |                                        |
| <i>CNR2</i>                                                                |                             |                             |                                        |
| <i>CNR1b</i>                                                               |                             |                             |                                        |
| <i>ACTB</i>                                                                |                             |                             |                                        |
| <b>Endpoint PCR</b>                                                        |                             |                             |                                        |
| <i>CNB1e4</i>                                                              | CCAGCAGACCAGGTGAACAT        | GTCGATGGCTGTGAGGAACA        |                                        |
|                                                                            | <b>5'-3' Forward Primer</b> | <b>5'-3' Reverse Primer</b> | <b>Probe</b>                           |
| <i>AAV2-ITR</i>                                                            | GGAACCCCTAGTGATGGAGT<br>T   | CGGCCTCAGTGAGCGA            | FAM-<br>CACTCCCTCTCTGCGCG<br>CTCG-BHQ1 |
| <b>ssDNA for CB1 gRNA cloning</b>                                          |                             |                             |                                        |
| tatactctgtgaaaggacgaaacaccgctggcgggtggcagacctctggttttagtactctggaacagaatcta |                             |                             |                                        |

**ESM Table 2. MRM transitions for ECs measurements in ESI+ and ESI-.**

| <b>Analyte</b>      | <b>Molecular ion<br/>[M+H]<sup>+</sup></b> | <b>Fragment [m/z]</b> | <b>DP<br/>[volts]</b> | <b>CE<br/>[volts]</b> | <b>CXP<br/>[volts]</b> |
|---------------------|--------------------------------------------|-----------------------|-----------------------|-----------------------|------------------------|
| 2-AG                | 379.2                                      | 287.1 (quantifier)    | 70                    | 19                    | 14                     |
|                     |                                            | 91 (qualifier)        | 70                    | 67                    | 10                     |
| AEA                 | 348.2                                      | 287.1 (quantifier)    | 26                    | 13                    | 16                     |
|                     |                                            | 62 (qualifier)        | 26                    | 13                    | 8                      |
| d <sub>4</sub> -AEA | 352.3                                      | 287.1 (quantifier)    | 66                    | 15                    | 20                     |
|                     |                                            | 66 (qualifier)        | 66                    | 21                    | 8                      |

<sup>a</sup> 2-AG = 2-arachidonoylglycerol; AEA = anandamide; DP = declustering potential; CE = collision energy; CXP = collision cell exit potential

# ESM Fig. 1 **a**

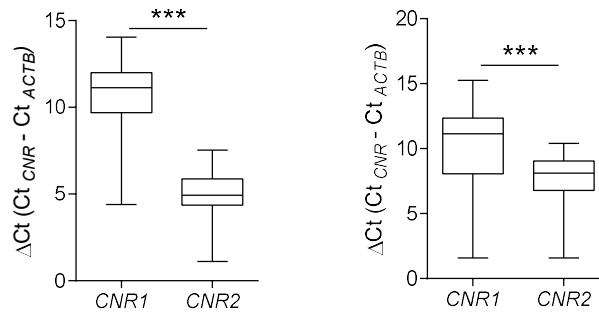

## **b**

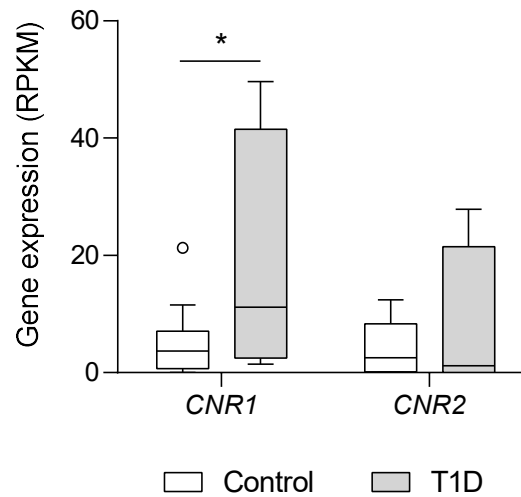

## **c**

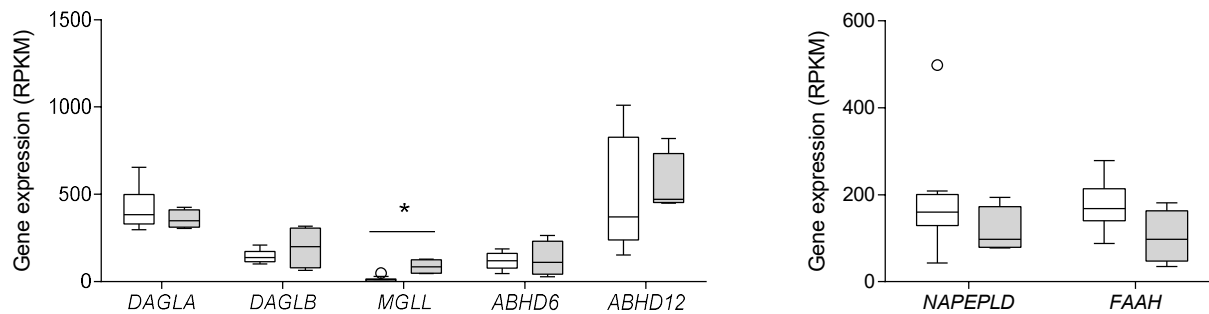

**ESM Figure 1.** Sorted islet beta cells from T1D donors have higher *CNR1* expression levels compared to those of healthy donors. **(a)** Comparison of *CNR1* and *CNR2* expression levels in PBMCs (left graph) and CD4<sup>+</sup> T cells (right graph) shown as the  $\Delta$ Ct of the specific gene and *ACTB* (higher  $\Delta$ Ct equals to lower expression). Gene expression of **(b)** *CNR1* and *CNR2* mRNA and **(c)** genes involved in 2-AG and AEA metabolism in sorted beta cells from islets of healthy donors (control;  $n = 10$ ) and donors with type 1 diabetes (T1D;  $n = 4$ ). The expression is shown as RPKM in Box & Whiskers Tukey graph. Data from GSE121863. Significance by 2-way ANOVA – Sidak post hoc test; \*  $p < 0.05$ .

# ESM Fig. 2

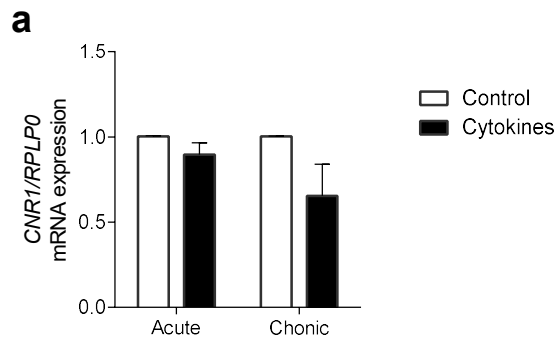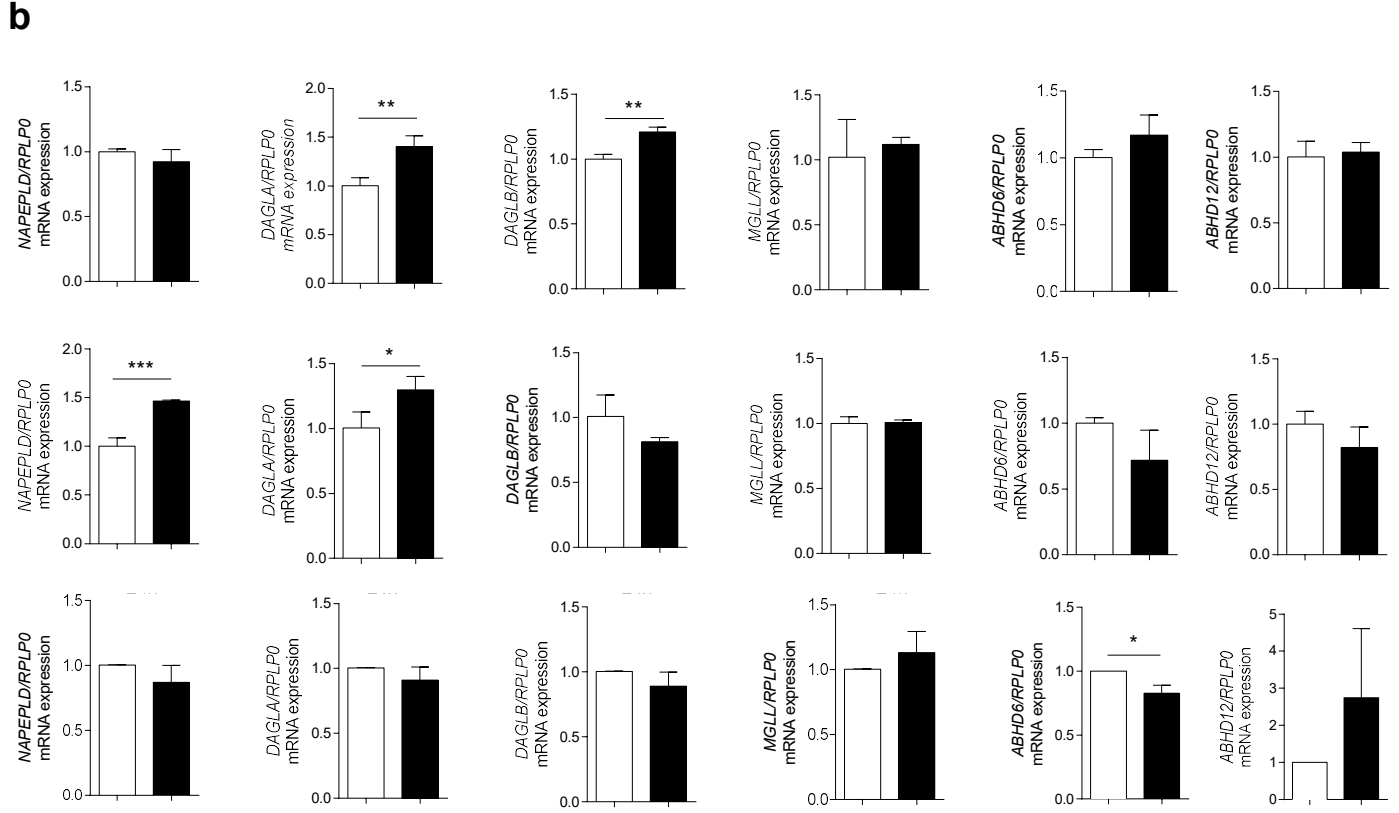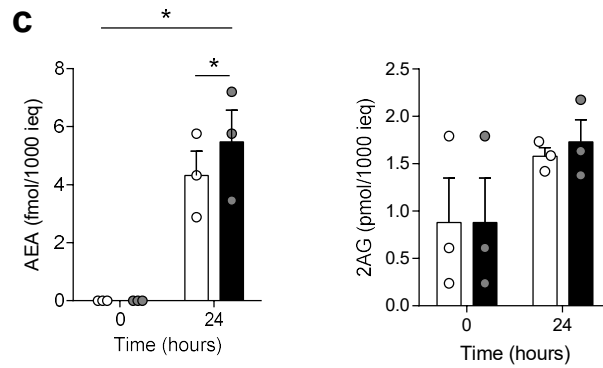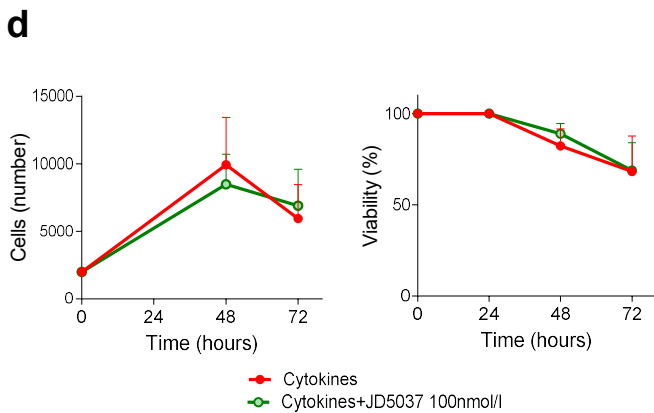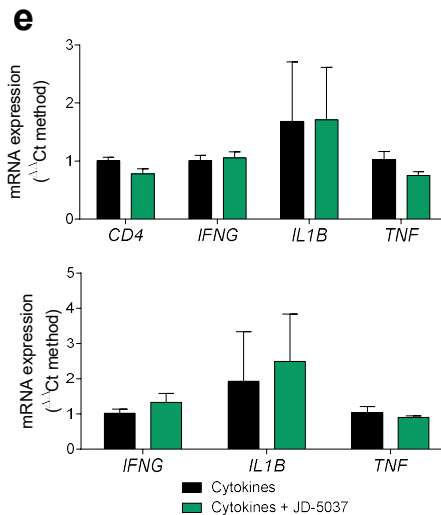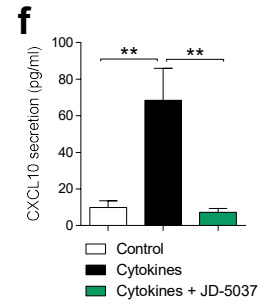

**ESM Figure 2.** Human islets in culture secrete high levels of endocannabinoids independently of cytokines. Expression of **(a)** *CNR1* mRNA in islets cultured for 2 (acute) or 24 h (chronic) with or without cytokines. The expression of *RPLP0* was used as a control. Data are mean  $\pm$  SEM,  $n = 4$  donors. Significance by 2-way ANOVA – Sidak post hoc test. **(b)** Expression of endocannabinoid enzymes after 1 (top graphs), 4 (middle graphs) or 24 hours (bottom graphs) of exposure to cytokines. Levels of **(c)** 2-arachidonoyl glycerol (2-AG) and anandamide (AEA) secreted to the media from islets (1000 IEQ) before and after 24 and 48 h of culture with or without cytokines. Data are mean  $\pm$  SEM,  $n = 3$  donors. Paired Significance by 2-way ANOVA – Sidak post hoc test; \*  $p < 0.05$ , \*\*  $p < 0.01$ . PBMCs were treated with cytokines in the presence of vehicle or JD-5037 (100 nmol/l) and **(d)** proliferation (left) and viability (right) of PBMCs, as well as **(e)** mRNA expression levels for proinflammatory cytokines, were determined. The expression of *GAPDH* (top graph) or *CD4* (bottom graph) was used as a control. **(f)** Secretion of CXCL10 by PBMCs into the media. Data are mean  $\pm$  SEM,  $n = 3$  donors. Significance by 1-way ANOVA – Tukey post hoc.

# ESM Fig. 3

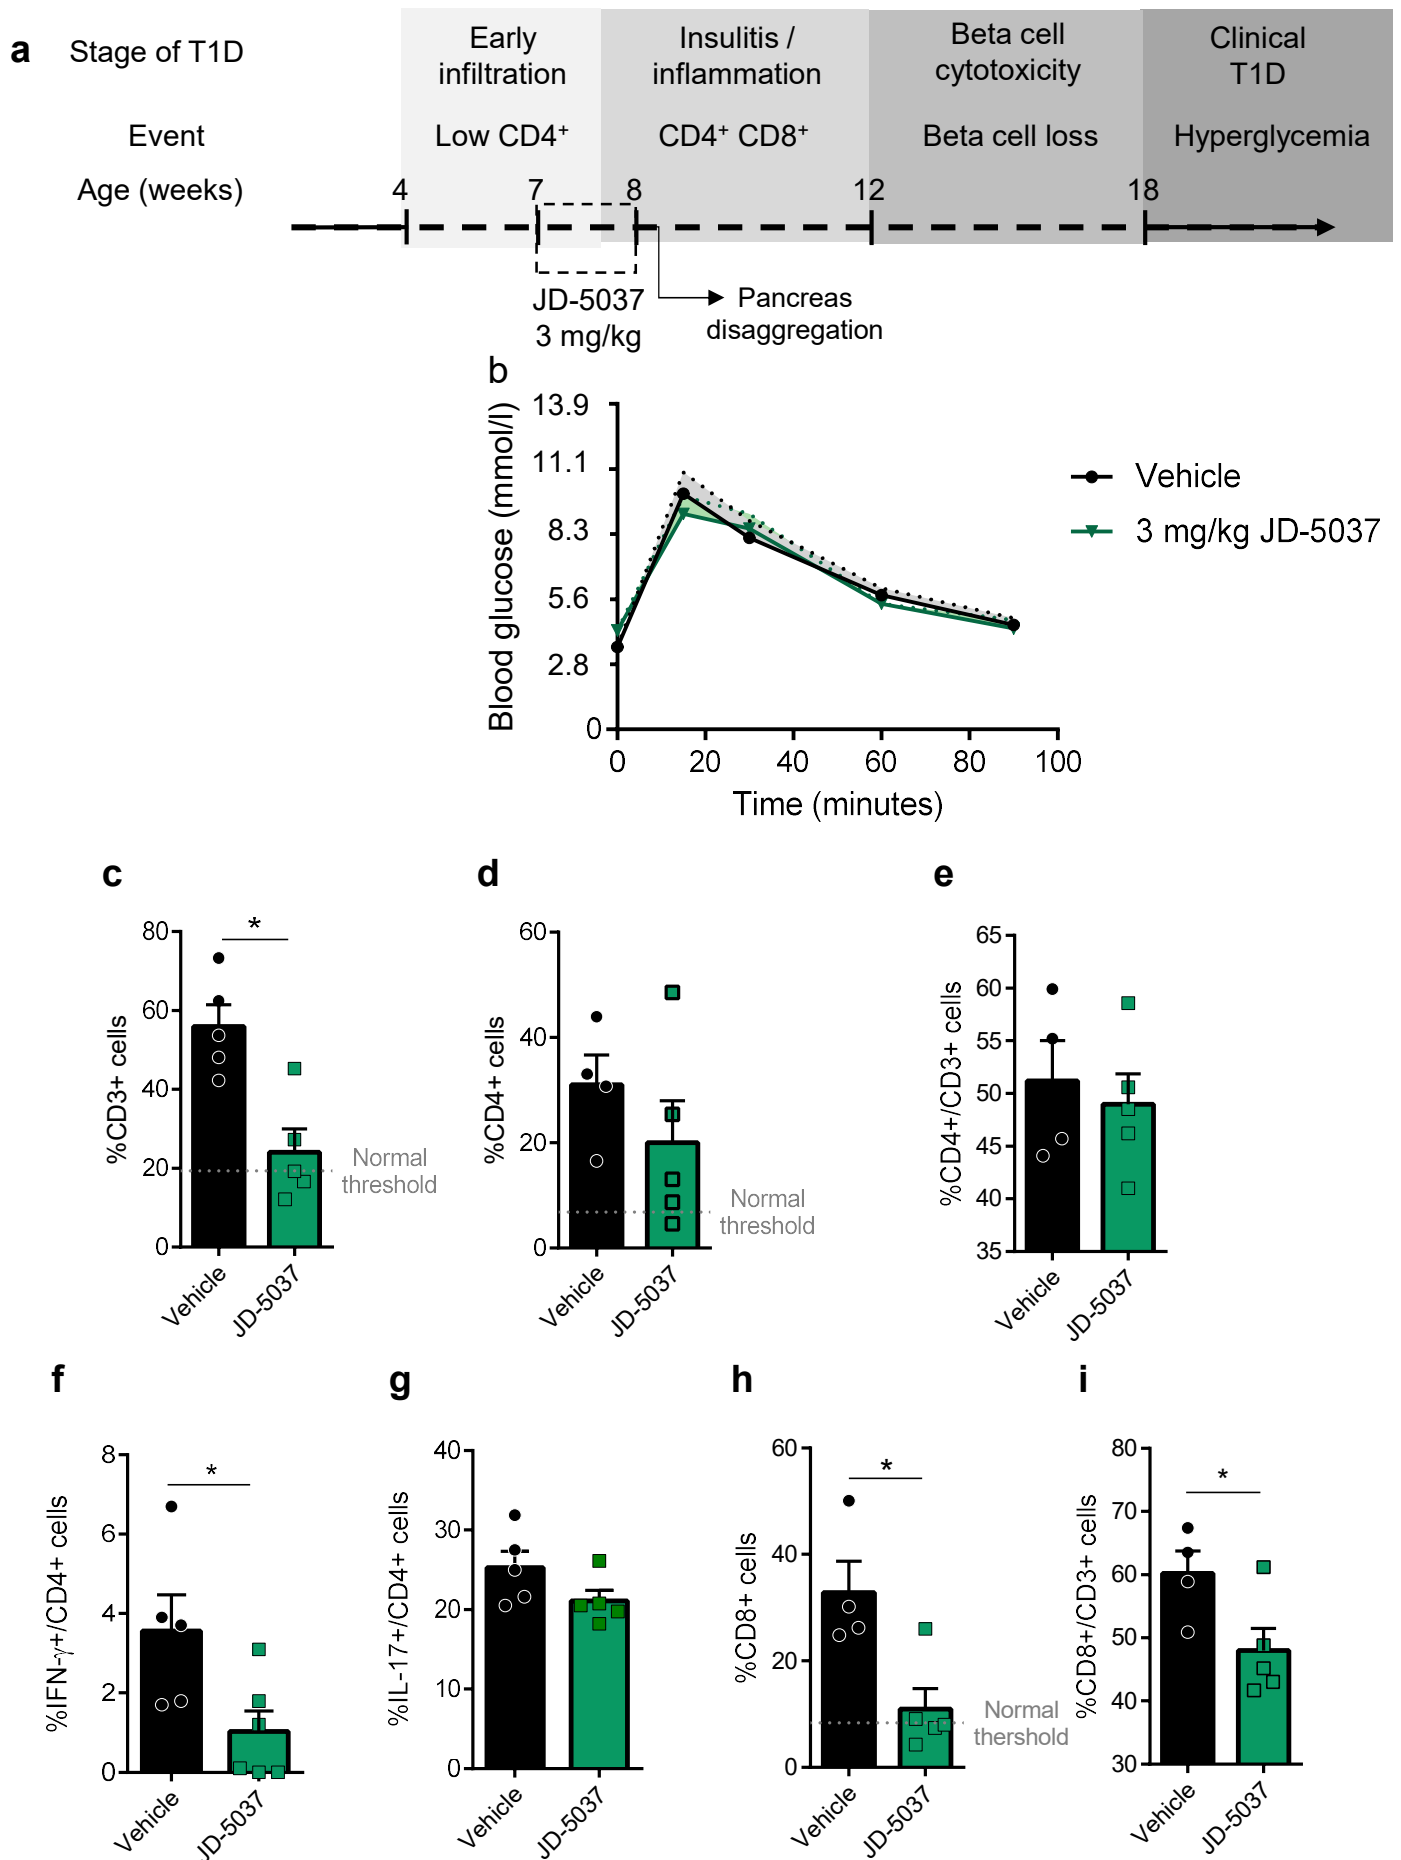

j

Vehicle-treated NOD

JD5037-treated NOD

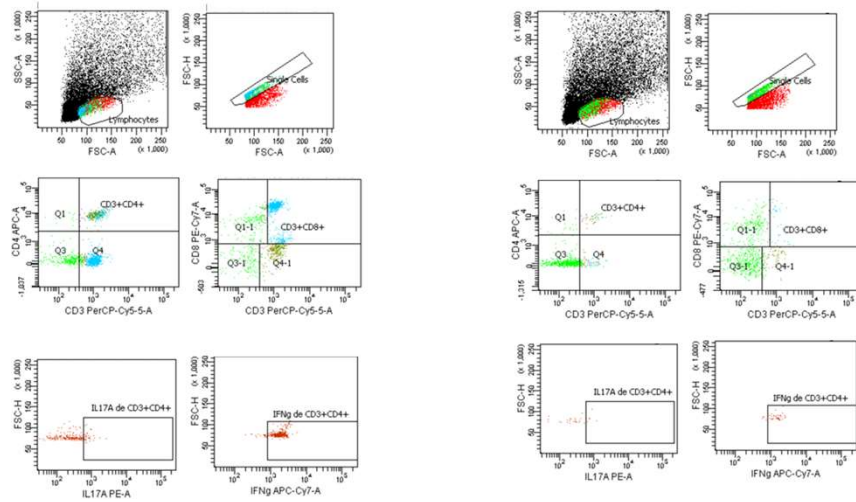

**ESM Figure 3.** Selective peripheral CB1R blockade arrests initiation of insulinitis in NOD mice. **(a)** Schema of the experimental procedure. **(b)** Intraperitoneal glucose tolerance test after 1-week treatment with vehicle or JD-5037. Quantification by flow cytometry of various immune cell subpopulations **(c-j)** in infiltrated lymphocytes in the pancreas of NOD mice treated with vehicle or JD-5037. Data are mean  $\pm$  SEM and individual values. The dotted line represents the values obtained in 4-week-old NOD mice. Significance by Student's t-test; \*  $p < 0.05$ ,  $n = 5-6$  mice/group.

# ESM Fig. 4

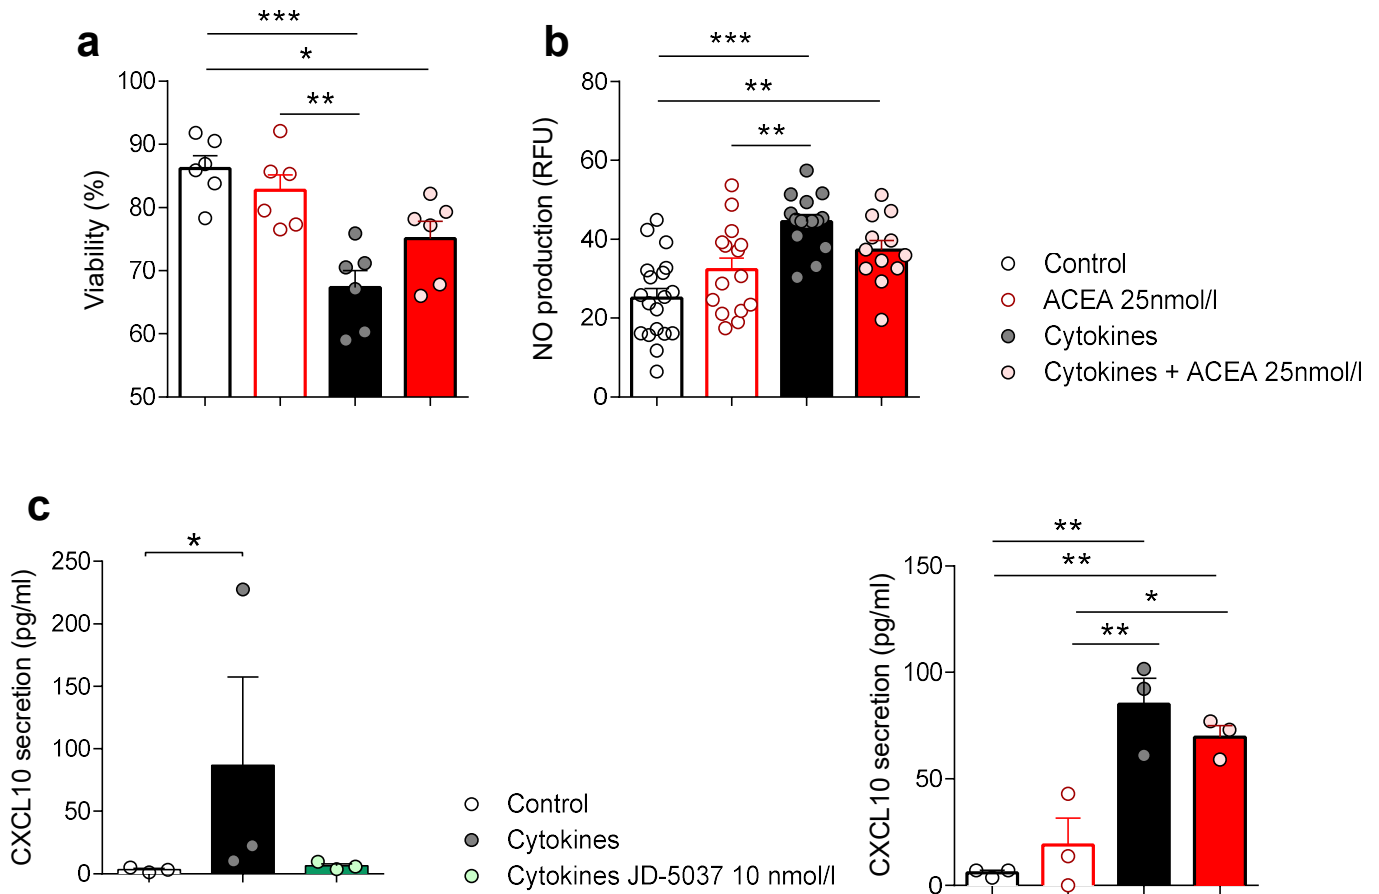

**ESM Figure 4.** ACEA and cytokines do not have a synergistic effect on islets. **(a)** Islet viability and **(b)** NO production in islets treated with vehicle of ACEA (25 nmol/l) and with a mix of cytokines. **(c)** Islet CXCL10 secretion into the media. Significance by 1-way ANOVA – Tukey post hoc test; \*  $p < 0.05$ , \*\*  $p < 0.01$ , \*\*\*  $p < 0.001$ ,  $n = 2-3$  donors.

# ESM Fig. 5

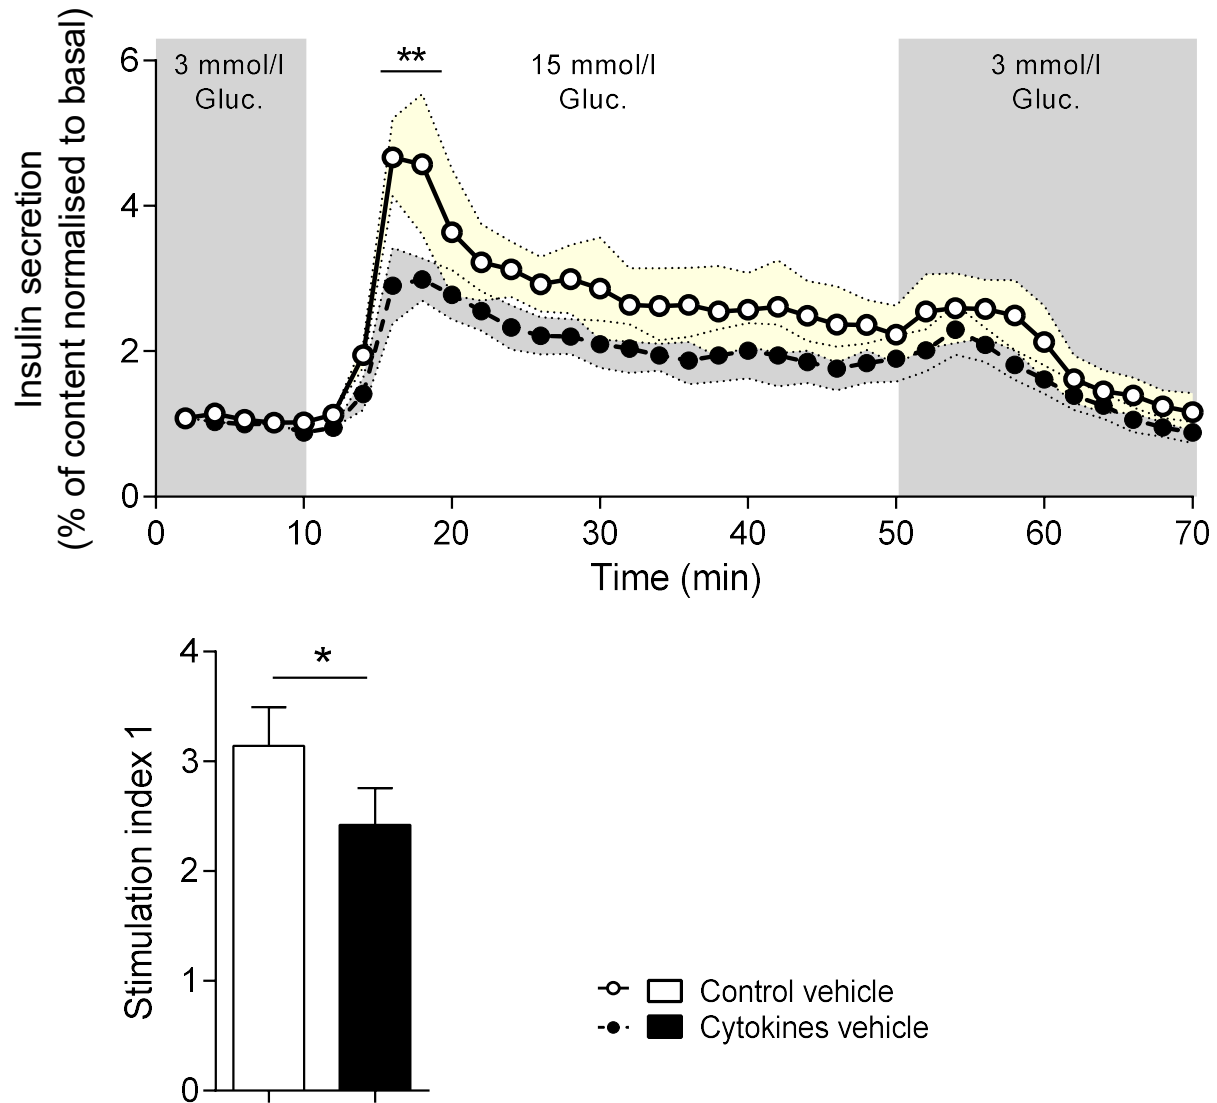

**ESM Figure 5.** Cytokines induce beta cell dysfunction. Dynamic GSIS after 24 h of insult with a mix of cytokines, and stimulation index,  $n = 6$  donors. Data are mean  $\pm$  SEM (shaded or error bars). \*  $p < 0.05$ , \*\*  $p < 0.01$  between cytokine and control groups.



|                                                                                   |                         |                         |                         |                         |                         |                         |                         |                         |
|-----------------------------------------------------------------------------------|-------------------------|-------------------------|-------------------------|-------------------------|-------------------------|-------------------------|-------------------------|-------------------------|
| Cold ischaemia time (h)                                                           |                         |                         |                         |                         |                         |                         |                         |                         |
| Estimated purity (%)                                                              | 70                      | 75                      | 80                      | 80                      | 90                      | 80                      | 80                      | 80                      |
| Estimated viability (%)                                                           | 95                      | 91.4                    | 92.9                    | 92.3                    | 94                      | 93.9                    | 91.3                    | 88.5                    |
| Total culture time (h) <sup>d</sup>                                               | 24H-Multiple timepoints | 36H-Multiple timepoints | 36H-Multiple timepoints | 24H-Multiple timepoints | 18H-Multiple timepoints | 24H-Multiple timepoints | 24H-Multiple timepoints | 24H-Multiple timepoints |
| Glucose-stimulated insulin secretion or other functional measurement <sup>e</sup> | S1/B 3.61               | S1/B 2.29               | S1/B 2.43               | S1/B 2.25               | S1/B 1.83               | S1/B 3.93               | S1/B 2.01               | S1/B 5.14               |
| Handpicked to purity?<br>Please select yes/no from drop down list                 | No                      | No                      | No                      | No                      | No                      | No                      | No                      | No                      |
| Additional notes                                                                  | CRISPR/Cas9             | CRISPR/Cas9             | Response to cytokines   | Response to cytokines   | Response to cytokines   | Response to cytokines   | CRISPR/Cas9             | CRISPR/Cas9             |

<sup>a</sup>If you have used more than eight islet preparations, please complete additional forms as necessary

<sup>b</sup>For example, IIDP, ECIT, Alberta IsletCore

<sup>c</sup>Please specify the therapy/therapies

<sup>d</sup>Time of islet culture at the isolation centre, during shipment and at the receiving laboratory

<sup>e</sup>Please specify the test and the results

| Islet preparation                                                           | 1                | 2                | 3                | 4                | 5                | 6                | 7                | 8 <sup>a</sup> |
|-----------------------------------------------------------------------------|------------------|------------------|------------------|------------------|------------------|------------------|------------------|----------------|
| <b>MANDATORY INFORMATION</b>                                                |                  |                  |                  |                  |                  |                  |                  |                |
| Unique identifier                                                           | EW1              | IG24             | IG25             | IG26             | IG27             | IG28             | IG30             |                |
| Donor age (years)                                                           | 28               | 49               | 26               | 70               | 29               | 56               | 50               |                |
| Donor sex (M/F)                                                             | M                | M                | F                | M                | M                | M                | F                |                |
| Donor BMI (kg/m <sup>2</sup> )                                              | 28.1             | 20.9             | 36.7             | 26.6             | 43.3             | 24               | 30               |                |
| Donor HbA <sub>1c</sub> (%)                                                 | 5.7              | 5.5              | 5.6              | 5.6              | 5.8              | 5.0              | 5.4              |                |
| Donor HbA <sub>1c</sub> (mmol/mol)                                          | 39               | 37               | 38               | 38               | 40               | 31               | 36               |                |
| Origin/source of islets <sup>b</sup>                                        | Inserm UMR1190   | Inserm UMR1190   | Inserm UMR1190   | Inserm UMR1190   | Inserm UMR1190   | Inserm UMR1190   | Inserm UMR1190   |                |
| Islet isolation centre                                                      | CHU, Univ. Lille | CHU, Univ. Lille | CHU, Univ. Lille | CHU, Univ. Lille | CHU, Univ. Lille | CHU, Univ. Lille | CHU, Univ. Lille |                |
| Donor history of diabetes?<br>Please select yes/no from drop down list      | No               | No               | No               | No               | No               | No               | No               |                |
| <b>If Yes, complete the next two lines if this information is available</b> |                  |                  |                  |                  |                  |                  |                  |                |
| Diabetes duration (years)                                                   |                  |                  |                  |                  |                  |                  |                  |                |
| Glucose-lowering therapy at time of death <sup>c</sup>                      |                  |                  |                  |                  |                  |                  |                  |                |
| <b>RECOMMENDED INFORMATION</b>                                              |                  |                  |                  |                  |                  |                  |                  |                |
| Donor cause of death                                                        |                  |                  |                  |                  |                  |                  |                  |                |
| Warm ischaemia time (h)                                                     |                  |                  |                  |                  |                  |                  |                  |                |
| Cold ischaemia time (h)                                                     |                  |                  |                  |                  |                  |                  |                  |                |

|                                                                                   |                         |                         |                         |                         |                         |                         |                         |  |
|-----------------------------------------------------------------------------------|-------------------------|-------------------------|-------------------------|-------------------------|-------------------------|-------------------------|-------------------------|--|
| Estimated purity (%)                                                              | 90                      | 90                      | 70                      | 70                      | 50                      | 40                      | 70                      |  |
| Estimated viability (%)                                                           | 93.1                    | 96.7                    | 72                      | 96                      | 91.8                    | 91.9                    | 93                      |  |
| Total culture time (h) <sup>d</sup>                                               | 24H-Multiple timepoints | 72H-Multiple timepoints | 36H-Multiple timepoints | 20H-Multiple timepoints | 24H-Multiple timepoints | 24H-Multiple timepoints | 24H-Multiple timepoints |  |
| Glucose-stimulated insulin secretion or other functional measurement <sup>e</sup> | S1/B 1.05               | S1/B 5.88               | S1/B 5.20               | S1/B 3.15               | S1/B 2.74               | S1/B 0.96               | S1/B 3.43               |  |
| Handpicked to purity?<br>Please select yes/no from drop down list                 | No                      | No                      | No                      | No                      | Yes                     | Yes                     | No                      |  |
| Additional notes                                                                  | Response to cytokines   | CRISPR/Cas9             | CRISPR/Cas9             | CRISPR/Cas9             | CRISPR/Cas9             | CRISPR/Cas9             | CRISPR/Cas9             |  |

<sup>a</sup>If you have used more than eight islet preparations, please complete additional forms as necessary

<sup>b</sup>For example, IIDP, ECIT, Alberta IsletCore

<sup>c</sup>Please specify the therapy/therapies

<sup>d</sup>Time of islet culture at the isolation centre, during shipment and at the receiving laboratory

<sup>e</sup>Please specify the test and the results

# Diabetologia

| Islet preparation                                                           | 1                | 2                | 3                | 4                | 5                | 6                | 7                | 8 <sup>a</sup>   |
|-----------------------------------------------------------------------------|------------------|------------------|------------------|------------------|------------------|------------------|------------------|------------------|
| <b>MANDATORY INFORMATION</b>                                                |                  |                  |                  |                  |                  |                  |                  |                  |
| Unique identifier                                                           | IG3              | IG4              | IG6              | IG8              | IG9              | IG10             | IG11             | IG12             |
| Donor age (years)                                                           | 55               | 33               | 56               | 46               | 44               | 50               | 61               | 73               |
| Donor sex (M/F)                                                             | F                | M                | M                | M                | M                | M                | F                | M                |
| Donor BMI (kg/m <sup>2</sup> )                                              | 27.5             | 24.5             | 25.2             | 21.1             | 27.8             | 24.7             | 23.3             | 26               |
| Donor HbA <sub>1c</sub> (%)                                                 | 5.5              | 5.1              | 5.3              |                  | 5.5              | 5.4              | 5.6              | 5.7              |
| Donor HbA <sub>1c</sub> (mmol/mol)                                          | 37               | 32               | 34               |                  | 37               | 36               | 38               | 39               |
| Origin/source of islets <sup>b</sup>                                        | Inserm UMR1190   | Inserm UMR1190   | Inserm UMR1190   | Inserm UMR1190   | Univ. Maastricht | Inserm UMR1190   | Inserm UMR1190   | Inserm UMR1190   |
| Islet isolation centre                                                      | CHU, Univ. Lille | CHU, Univ. Lille | CHU, Univ. Lille | CHU, Univ. Lille |                  | CHU, Univ. Lille | CHU, Univ. Lille | CHU, Univ. Lille |
| Donor history of diabetes?<br>Please select yes/no from drop down list      | No               | No               | No               | Yes              | No               | No               | No               | No               |
| <b>If Yes, complete the next two lines if this information is available</b> |                  |                  |                  |                  |                  |                  |                  |                  |
| Diabetes duration (years)                                                   |                  |                  |                  |                  |                  |                  |                  |                  |
| Glucose-lowering therapy at time of death <sup>c</sup>                      |                  |                  |                  |                  |                  |                  |                  |                  |
| <b>RECOMMENDED INFORMATION</b>                                              |                  |                  |                  |                  |                  |                  |                  |                  |
| Donor cause of death                                                        |                  |                  |                  |                  |                  |                  |                  |                  |
| Warm ischaemia time (h)                                                     |                  |                  |                  |                  |                  |                  |                  |                  |
| Cold ischaemia time (h)                                                     |                  |                  |                  |                  |                  |                  |                  |                  |
| Estimated purity (%)                                                        | 80               | 90               | 80               | 90               | 90               | 80               | 80               | 90               |

|                                                                                   |                         |                         |                         |                         |                         |                         |                         |                         |
|-----------------------------------------------------------------------------------|-------------------------|-------------------------|-------------------------|-------------------------|-------------------------|-------------------------|-------------------------|-------------------------|
| Estimated viability (%)                                                           | 96                      | 97                      | 98.7                    | 97                      | 97.7                    | 95                      | 98                      | 97                      |
| Total culture time (h) <sup>d</sup>                                               | 24H-Multiple timepoints | 96H-Multiple timepoints | 24H-Multiple timepoints | 24H-Multiple timepoints | 48H-Multiple timepoints | 36H-Multiple timepoints | 48H-Multiple timepoints | 24H-Multiple timepoints |
| Glucose-stimulated insulin secretion or other functional measurement <sup>e</sup> | S1/B 3.69               | S1/B 1.62               | S1/B 6.76               | S1/B 4.7                | S1/B 1.97               | S1/B 13.67              | S1/B 3.68               | S1/B 1.24               |
| Handpicked to purity?<br>Please select yes/no from drop down list                 | No                      | No                      | No                      | No                      | No                      | No                      | No                      | No                      |
| Additional notes                                                                  | Response to cytokines   | Response to cytokines   | Response to cytokines   | Response to cytokines   | Response to cytokines   | Response to cytokines   | Response to cytokines   | Response to cytokines   |

<sup>a</sup>If you have used more than eight islet preparations, please complete additional forms as necessary

<sup>b</sup>For example, IIDP, ECIT, Alberta IsletCore

<sup>c</sup>Please specify the therapy/therapies

<sup>d</sup>Time of islet culture at the isolation centre, during shipment and at the receiving laboratory

<sup>e</sup>Please specify the test and the results

| Islet preparation                                                           | 1                   | 2                   | 3 | 4 | 5 | 6 | 7 | 8 <sup>a</sup> |
|-----------------------------------------------------------------------------|---------------------|---------------------|---|---|---|---|---|----------------|
| <b>MANDATORY INFORMATION</b>                                                |                     |                     |   |   |   |   |   |                |
| Unique identifier                                                           | IG33                | IG34                |   |   |   |   |   |                |
| Donor age (years)                                                           | 58                  | 65                  |   |   |   |   |   |                |
| Donor sex (M/F)                                                             | F                   | F                   |   |   |   |   |   |                |
| Donor BMI (kg/m <sup>2</sup> )                                              | 24                  | 51                  |   |   |   |   |   |                |
| Donor HbA <sub>1c</sub> (%)                                                 | 6.1                 | 5                   |   |   |   |   |   |                |
| Donor HbA <sub>1c</sub> (mmol/mol)                                          | 43                  | 31                  |   |   |   |   |   |                |
| Origin/source of islets <sup>b</sup>                                        | Inserm<br>UMR1190   | Inserm<br>UMR1190   |   |   |   |   |   |                |
| Islet isolation centre                                                      | CHU, Univ.<br>Lille | CHU, Univ.<br>Lille |   |   |   |   |   |                |
| Donor history of diabetes?<br>Please select yes/no from<br>drop down list   | No                  | No                  |   |   |   |   |   |                |
| <b>If Yes, complete the next two lines if this information is available</b> |                     |                     |   |   |   |   |   |                |
| Diabetes duration (years)                                                   |                     |                     |   |   |   |   |   |                |
| Glucose-lowering therapy at<br>time of death <sup>c</sup>                   |                     |                     |   |   |   |   |   |                |
| <b>RECOMMENDED INFORMATION</b>                                              |                     |                     |   |   |   |   |   |                |
| Donor cause of death                                                        |                     |                     |   |   |   |   |   |                |
| Warm ischaemia time (h)                                                     |                     |                     |   |   |   |   |   |                |
| Cold ischaemia time (h)                                                     |                     |                     |   |   |   |   |   |                |
| Estimated purity (%)                                                        | 70                  |                     |   |   |   |   |   |                |

|                                                                                   |                  |                  |  |  |  |  |  |  |
|-----------------------------------------------------------------------------------|------------------|------------------|--|--|--|--|--|--|
| Estimated viability (%)                                                           | 92               |                  |  |  |  |  |  |  |
| Total culture time (h) <sup>d</sup>                                               | 24H-24H          | 24H-24H          |  |  |  |  |  |  |
| Glucose-stimulated insulin secretion or other functional measurement <sup>e</sup> |                  |                  |  |  |  |  |  |  |
| Handpicked to purity?<br>Please select yes/no from drop down list                 | No               | No               |  |  |  |  |  |  |
| Additional notes                                                                  | Response to ACEA | Response to ACEA |  |  |  |  |  |  |

<sup>a</sup>If you have used more than eight islet preparations, please complete additional forms as necessary

<sup>b</sup>For example, IIDP, ECIT, Alberta IsletCore

<sup>c</sup>Please specify the therapy/therapies

<sup>d</sup>Time of islet culture at the isolation centre, during shipment and at the receiving laboratory

<sup>e</sup>Please specify the test and the results
